# Supplementary material for: Galvanic replacement approach for bifunctional polyacrylonitrile/Ag–M (M = Au or Pd) nanofibers as SERS-active substrates for monitoring catalytic reactions
Source: Royal Society of Chemistry journal article supplement (doi:10.1039/c3ta11435j), 2013-01-01
Supplement: c3ta11435j.pdf [file c3ta11435j.pdf]

## Supporting Information for:

# Galvanic Replacement Approach for Bifunctional Polyacrylonitrile/Ag-M (M=Au or Pd) Nanofibers as SERS-active Substrates for Monitoring Catalytic Reaction

Minhua Cao, Lin Zhou, Xiaoqian Xu, Si Cheng\*, Jian-Lin Yao and Li-Juan Fan\*

Jiangsu Key Laboratory of Advanced Functional Polymer Design and Application  
Department of Polymer Science and Engineering,  
College of Chemistry, Chemical Engineering and Materials Science,  
Soochow University,  
Suzhou, Jiangsu, 215123, China  
E-mail: chengsi@suda.edu.cn, ljfan@suda.edu.cn

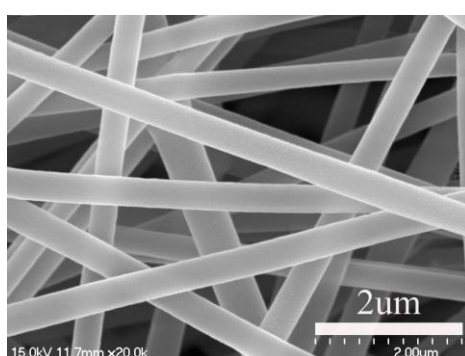

**Fig. S1** SEM image of electrospun PAN/AgNO<sub>3</sub> nanofibers

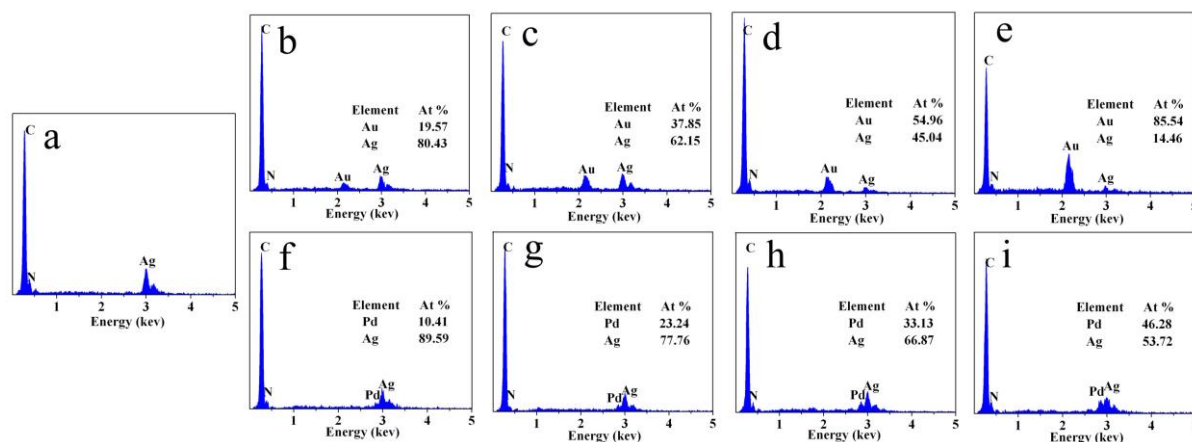

**Fig. S2** SEM-EDS spectra of PAN/Ag nanofibers (a) PAN/Ag-M (M=Au or Pd) bimetallic nanofibers (b-i) with different composition: (b) PAN/Ag<sub>0.8</sub>Au<sub>0.2</sub>; (c) PAN/Ag<sub>0.6</sub>Au<sub>0.4</sub>; (d) PAN/Ag<sub>0.45</sub>Au<sub>0.55</sub>; (e) PAN/Ag<sub>0.3</sub>Au<sub>0.7</sub>; (f) PAN/Ag<sub>0.9</sub>Pd<sub>0.1</sub>; (g) PAN/Ag<sub>0.77</sub>Pd<sub>0.23</sub>; (h) PAN/Ag<sub>0.67</sub>Pd<sub>0.33</sub>; (i) PAN/Ag<sub>0.54</sub>Pd<sub>0.46</sub> bimetallic nanofibers.

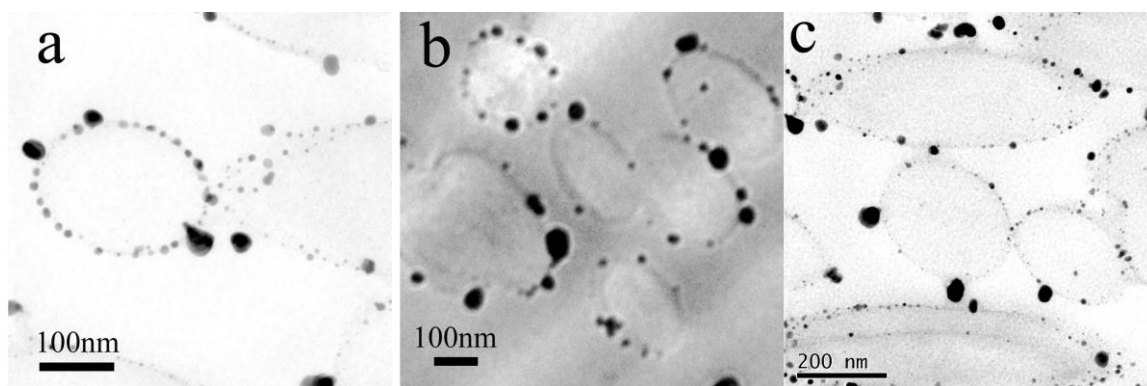

**Fig. S3** Cross-sectional TEM images of (a) PAN/Ag nanofibers, (b) PAN/Ag<sub>0.6</sub>Au<sub>0.4</sub> nanofibers and (c) PAN/Ag<sub>0.9</sub>Pd<sub>0.1</sub> nanofibers

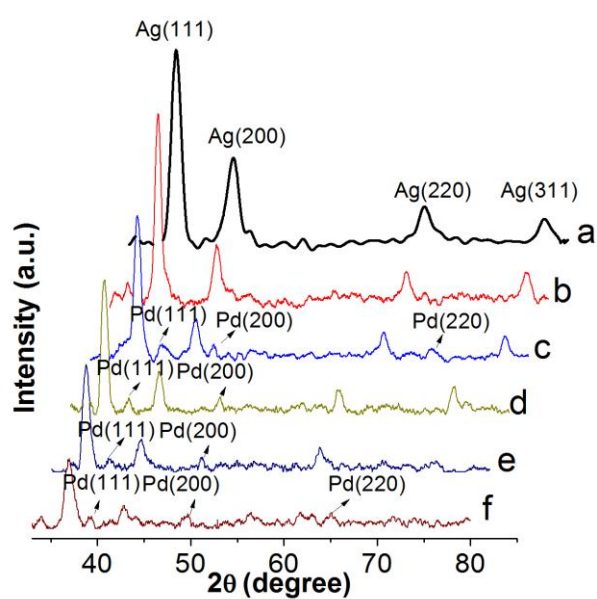

**Fig.S4** The XRD pattern of (a) PAN/Ag, (b) PAN/Ag<sub>0.80</sub>Au<sub>0.20</sub>, (c) PAN/Ag<sub>0.90</sub>Pd<sub>0.10</sub>. (d) PAN/Ag<sub>0.77</sub>Pd<sub>0.23</sub>. (e) PAN/Ag<sub>0.67</sub>Pd<sub>0.33</sub>. (f) PAN/Ag<sub>0.54</sub>Pd<sub>0.46</sub> bimetallic nanofibers.

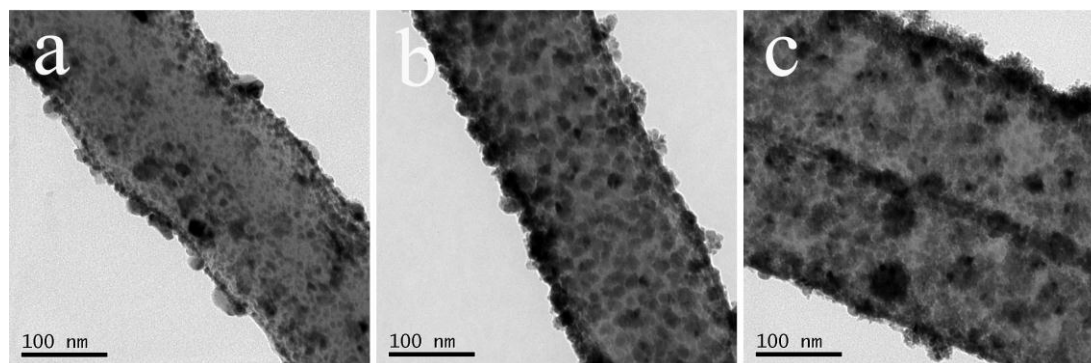

**Fig. S5** TEM images of single fiber for PAN/Ag<sub>0.77</sub>Pd<sub>0.23</sub> (a), PAN/Ag<sub>0.67</sub>Pd<sub>0.33</sub> (b) and PAN/Ag<sub>0.54</sub>Pd<sub>0.46</sub> (c) bimetallic nanofiber

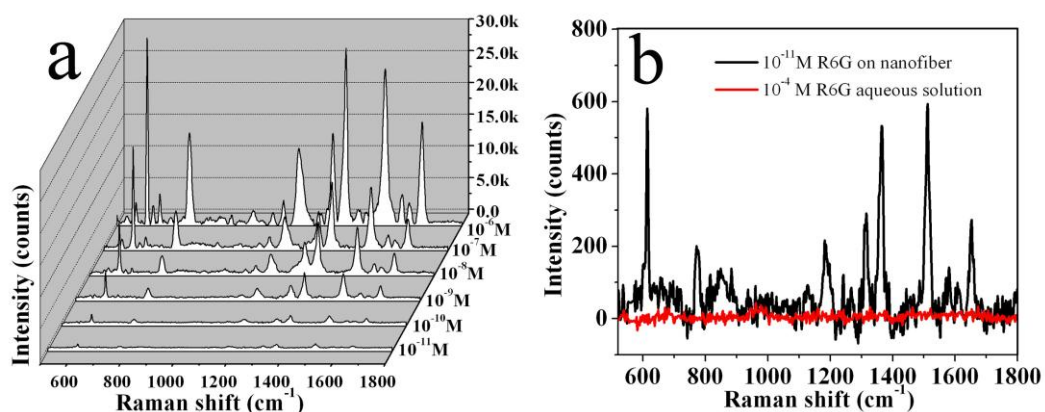

**Fig. S6** (a) SERS spectra of R6G ( $10^{-6}$ - $10^{-11}$ M) absorbed on PAN/Ag<sub>0.6</sub>Au<sub>0.4</sub> bimetallic nanofibers. (b) SERS spectrum of R6G ( $10^{-11}$ M) absorbed on PAN/Ag<sub>0.6</sub>Au<sub>0.4</sub> bimetallic nanofibers and Raman spectrum of R6G aqueous solution ( $10^{-4}$  M).

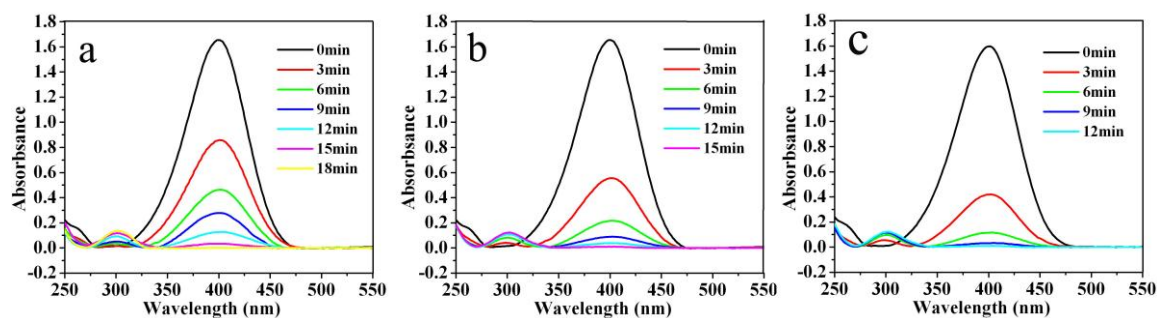

**Fig. S7** Time dependent UV-vis absorption spectra for the reduction of 4-NP by NaBH<sub>4</sub> in the presence of: (a) PAN/Ag; (b) PAN/Ag<sub>0.6</sub>Au<sub>0.4</sub>; (c) PAN/Ag<sub>0.9</sub>Pd<sub>0.1</sub> bimetallic nanofibers.

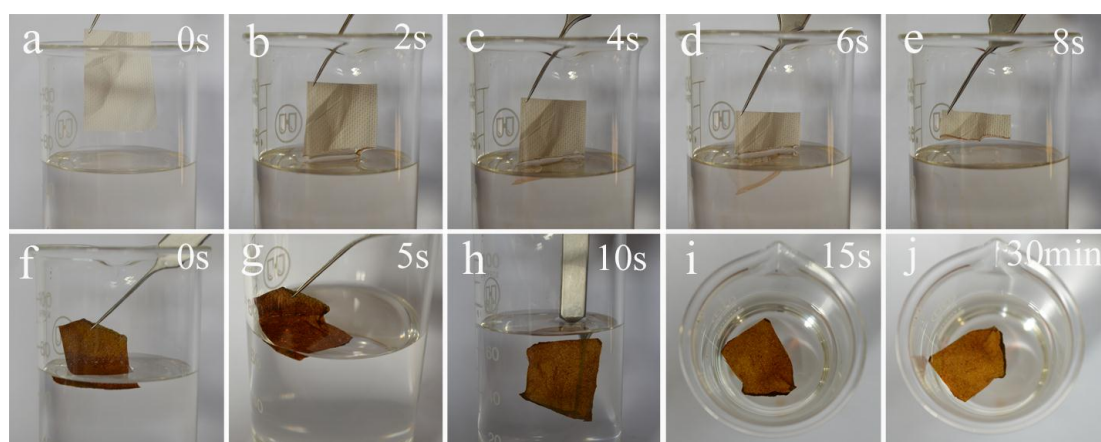

**Fig. S8** Photos of PAN nanofibers mats (a-e) and PAN/Ag<sub>0.60</sub>Au<sub>0.40</sub> nanofibrous mats (f-j) in DMF solution at different time interval

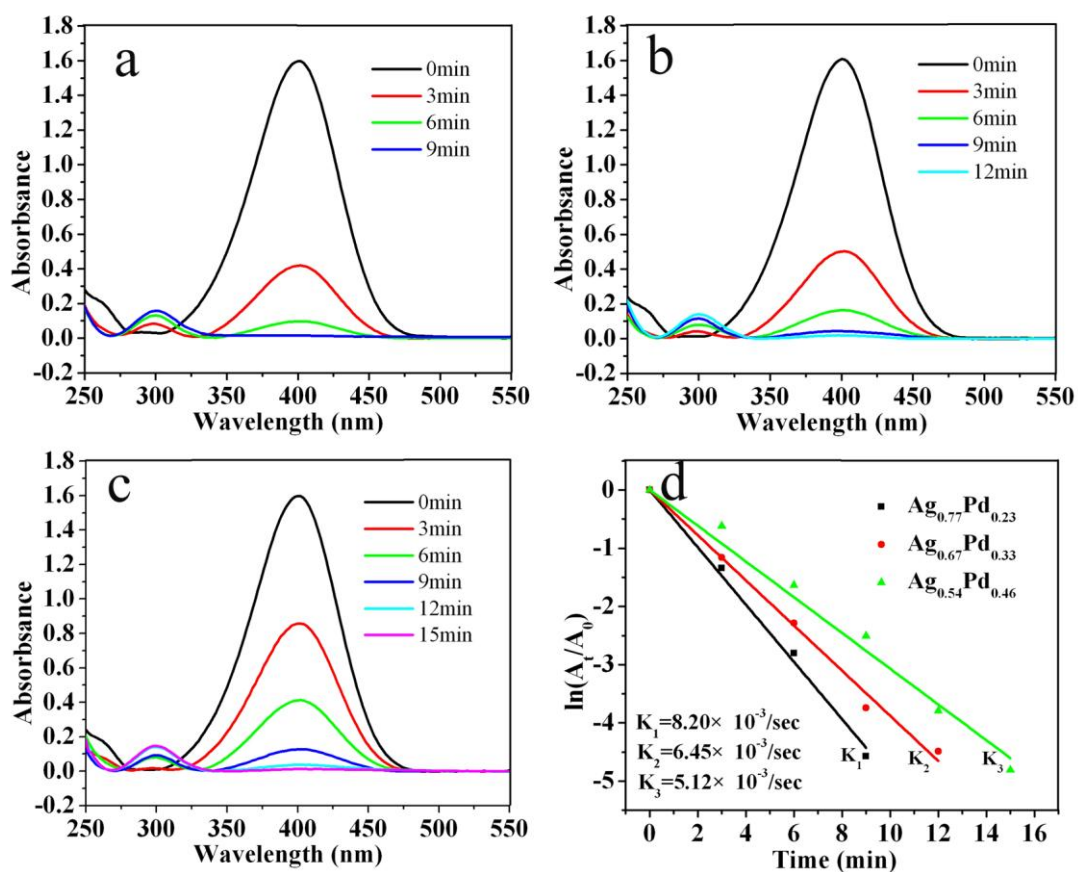

**Fig. S9** Time dependent UV-vis absorption spectra for the reduction of 4-NP by  $\text{NaBH}_4$  in the presence of: (a) PAN/ $\text{Ag}_{0.77}\text{Pd}_{0.23}$ ; (b) PAN/ $\text{Ag}_{0.67}\text{Pd}_{0.33}$ ; (c) PAN/ $\text{Ag}_{0.54}\text{Pd}_{0.46}$  bimetallic nanofibers.; (d) Plot of  $\ln(A_t/A_0)$  as a function of time for the reduction of 4-NP by  $\text{NaBH}_4$  catalyzed by PAN/ $\text{Ag}_{0.90}\text{Pd}_{0.10}$ , PAN/ $\text{Ag}_{0.77}\text{Pd}_{0.23}$ , PAN/ $\text{Ag}_{0.67}\text{Pd}_{0.33}$ , and PAN/ $\text{Ag}_{0.54}\text{Pd}_{0.46}$  bimetallic nanofibers.

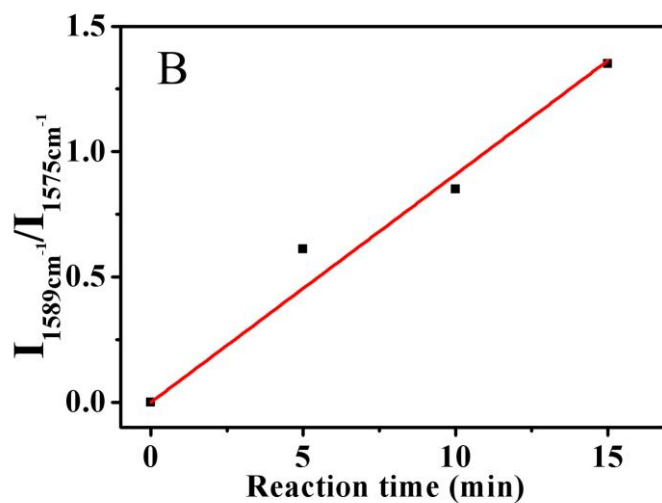

**Fig. S10** The relationship between the ratio of intensity of the  $1589\text{ cm}^{-1}$  to the  $1575\text{ cm}^{-1}$  and reaction time.
